# Supplementary material for: Epitactic growth of celestite on anhydrite: substrate induced twinning and morphological evolution of aggregates
Source: Royal Society of Chemistry journal article supplement (doi:10.1039/d0ce00755b), 2020-01-01
Supplement: d0ce00755b1.pdf [file d0ce00755b1.pdf]

### ***Supplementary Material:***

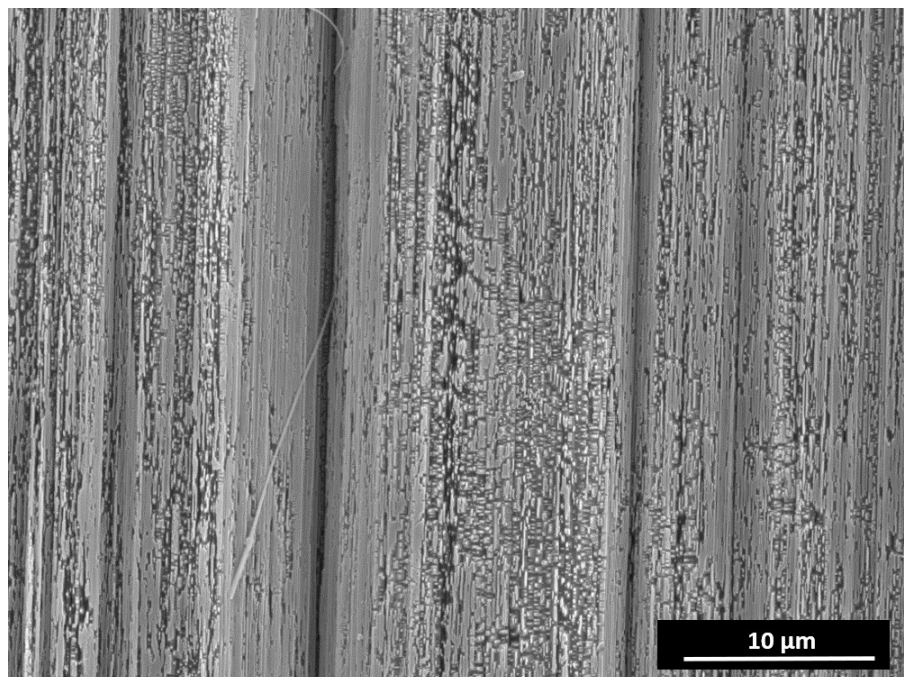

**Figure S1.** (a) SEM image of an anhydrite (001) cleavage surface after 2 hours interaction with a Sr-bearing aqueous solution [ $Sr = 0.1 \text{ g/L}$ ]. The nucleation of a secondary phase is not observed regardless the interaction time when the initial concentration of Sr in the aqueous solution is  $0.1 \text{ g/L}$ .

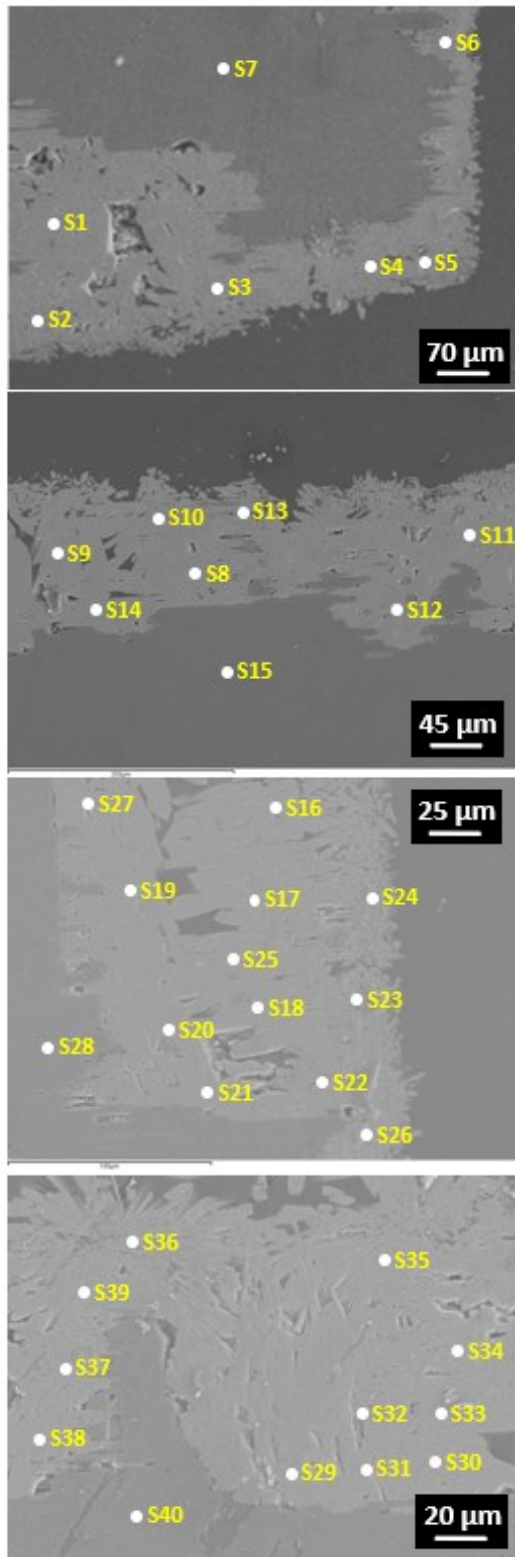

| Spectrum   | In stats. | S     | Ca    | Sr    | O     | Total  |
|------------|-----------|-------|-------|-------|-------|--------|
| Spectrum 1 | Yes       | 16.51 | 0.02  | 49.67 | 33.80 | 100.00 |
| Spectrum 2 | Yes       | 16.31 | 0.13  | 49.97 | 33.59 | 100.00 |
| Spectrum 3 | Yes       | 16.90 | 0.17  | 48.68 | 34.26 | 100.00 |
| Spectrum 4 | Yes       | 17.41 | 0.22  | 47.53 | 34.83 | 100.00 |
| Spectrum 5 | Yes       | 16.24 | 0.36  | 49.84 | 33.56 | 100.00 |
| Spectrum 6 | Yes       | 16.30 | 1.27  | 48.65 | 33.79 | 100.00 |
| Spectrum 7 | Yes       | 23.50 | 29.32 | 0.26  | 46.92 | 100.00 |

| Spectrum    | In stats. | S     | Ca    | Sr    | O     | Total  |
|-------------|-----------|-------|-------|-------|-------|--------|
| Spectrum 8  | Yes       | 16.01 | 0.64  | 50.00 | 33.35 | 100.00 |
| Spectrum 9  | Yes       | 16.63 | 0.17  | 49.24 | 33.96 | 100.00 |
| Spectrum 10 | Yes       | 15.79 | 0.08  | 51.13 | 33.00 | 100.00 |
| Spectrum 11 | Yes       | 16.20 | 0.10  | 50.25 | 33.46 | 100.00 |
| Spectrum 12 | Yes       | 16.66 | 0.29  | 49.05 | 34.01 | 100.00 |
| Spectrum 13 | Yes       | 16.64 | 0.04  | 49.39 | 33.94 | 100.00 |
| Spectrum 14 | Yes       | 15.96 | 0.38  | 50.41 | 33.25 | 100.00 |
| Spectrum 15 | Yes       | 23.82 | 28.81 | 0.19  | 47.18 | 100.00 |

| Spectrum    | In stats. | S     | Ca    | Sr    | O     | Total  |
|-------------|-----------|-------|-------|-------|-------|--------|
| Spectrum 16 | Yes       | 15.81 | 0.20  | 50.94 | 33.05 | 100.00 |
| Spectrum 17 | Yes       | 16.42 | 0.11  | 49.76 | 33.71 | 100.00 |
| Spectrum 18 | Yes       | 16.04 | 0.30  | 50.35 | 33.32 | 100.00 |
| Spectrum 19 | Yes       | 16.33 | 0.06  | 50.01 | 33.60 | 100.00 |
| Spectrum 20 | Yes       | 15.79 | 0.15  | 51.05 | 33.01 | 100.00 |
| Spectrum 21 | Yes       | 15.84 | 0.15  | 50.93 | 33.08 | 100.00 |
| Spectrum 22 | Yes       | 15.51 | 3.84  | 47.26 | 33.38 | 100.00 |
| Spectrum 23 | Yes       | 16.89 | 2.00  | 46.54 | 34.58 | 100.00 |
| Spectrum 24 | Yes       | 15.77 | 1.18  | 49.86 | 33.19 | 100.00 |
| Spectrum 25 | Yes       | 15.62 | 0.21  | 51.33 | 32.84 | 100.00 |
| Spectrum 26 | Yes       | 16.75 | 0.22  | 48.95 | 34.09 | 100.00 |
| Spectrum 27 | Yes       | 16.26 | 0.17  | 50.02 | 33.54 | 100.00 |
| Spectrum 28 | Yes       | 23.62 | 29.41 | -0.11 | 47.08 | 100.00 |

| Spectrum    | In stats. | S     | Ca    | Sr    | O     | Total  |
|-------------|-----------|-------|-------|-------|-------|--------|
| Spectrum 29 | Yes       | 15.60 | 0.27  | 51.30 | 32.83 | 100.00 |
| Spectrum 30 | Yes       | 15.82 | 0.58  | 50.47 | 33.13 | 100.00 |
| Spectrum 31 | Yes       | 16.68 | 0.27  | 49.01 | 34.03 | 100.00 |
| Spectrum 32 | Yes       | 16.72 | 0.43  | 48.75 | 34.10 | 100.00 |
| Spectrum 33 | Yes       | 16.06 | 0.67  | 49.86 | 33.41 | 100.00 |
| Spectrum 34 | Yes       | 16.12 | 0.18  | 50.32 | 33.39 | 100.00 |
| Spectrum 35 | Yes       | 15.49 | 0.20  | 51.61 | 32.70 | 100.00 |
| Spectrum 36 | Yes       | 15.71 | 0.42  | 50.89 | 32.98 | 100.00 |
| Spectrum 37 | Yes       | 15.85 | 0.38  | 50.63 | 33.13 | 100.00 |
| Spectrum 38 | Yes       | 16.22 | 0.04  | 50.27 | 33.47 | 100.00 |
| Spectrum 39 | Yes       | 16.29 | 0.37  | 49.74 | 33.61 | 100.00 |
| Spectrum 40 | Yes       | 23.77 | 28.57 | 0.57  | 47.09 | 100.00 |

**Figure S2.** BSE images of an anhydrite crystal cross-cut along (100) after 7 days interaction with a Sr-bearing aqueous solution ( $[Sr]_{aq} = 50$  g/L). The darker phase corresponds to the original anhydrite substrate, while the brighter one corresponds to the celestine rim. 40 EDS analyzes performed on this polished sample show that the secondary celestine incorporates small amounts of calcium in amounts ranging from 0.02 wt.% to 3.84 wt. %.

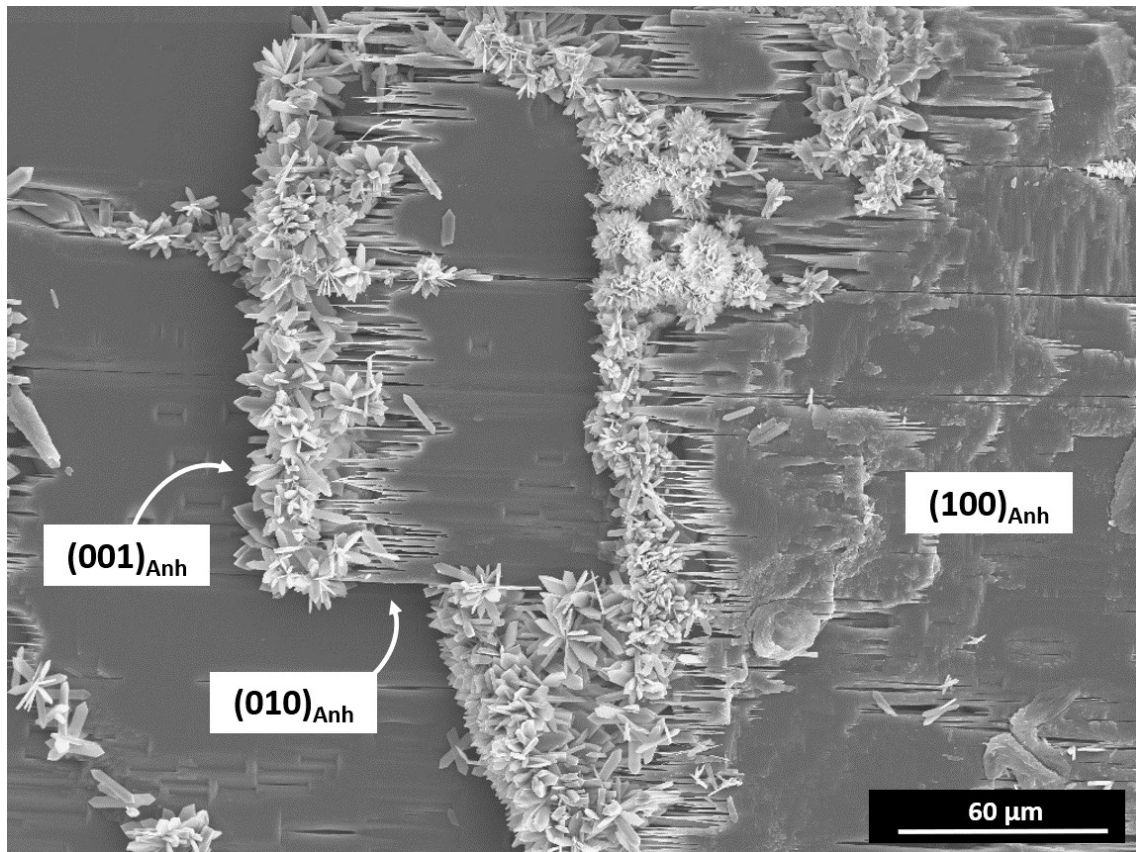

**Figure S3.** SEM image of an anhydrite (100) cleavage surface after 1 hour interaction with a Sr-bearing aqueous solution [ $Sr = 10 \text{ g/L}$ ]. The orientation of the anhydrite substrate plays a relevant role in the speed at which the original anhydrite surfaces become carpeted by celestine crystals. Thus, for solutions with the same Sr concentration, (001) surfaces are covered by celestine crystals more quickly than (100) and (010) surfaces.

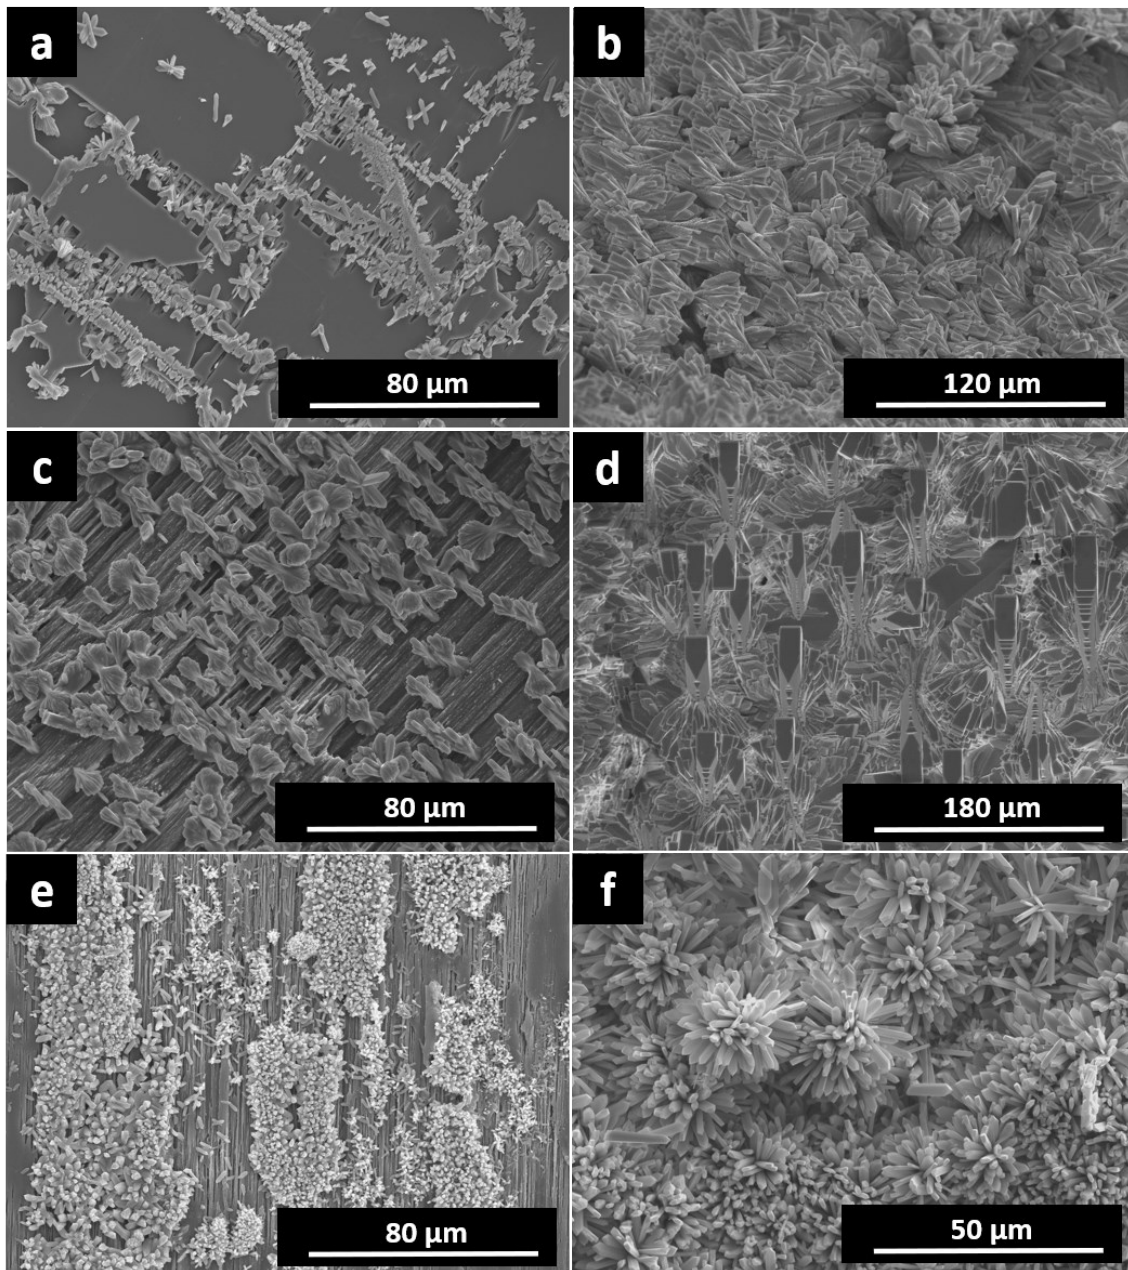

**Figure S4.** SEM micrographs showing anhydrite main cleavage surfaces of anhydrite (a,b) (100), (c,d) (001) and (e,f) (010) after 2 hours (a,c,e) and 5 days (b,d,f) interaction with an aqueous solution bearing  $[Sr] = 50 \text{ g/L}$ .
